# Supplementary material for: Campylobacter jejuni strains with different pathogenic potential shapes host-pathogen interactions and gut microbiota dynamics
Source: Research Square preprint supplement (doi:10.21203/rs.3.rs-8346657/v1), 2026-01-19
Supplement: Supplementary file 1 [file ce6f71ed0403dd1c2cf1690f.xlsx]

## Sheet: 2dpi_asv
Taxonomy							Control	Benign	Harmful	Invasive
k__Bacteria	p__Firmicutes	c__Clostridia	o__Clostridiales	f__Ruminococcaceae	g__Oscillospira	s__	0.079173	0	0.0410865	0.024473
k__Bacteria	p__Firmicutes	c__Bacilli	o__Lactobacillales	f__Streptococcaceae	g__Streptococcus	s__alactolyticus	0.00622126	0	0	0
k__Bacteria	p__Firmicutes	c__Clostridia	o__Clostridiales	f__Lachnospiraceae	g__Blautia	s__	0.00217196	0.000176507	3.25064e-05	6.41989e-05
k__Bacteria	p__Firmicutes	c__Clostridia	o__Clostridiales	f__Lachnospiraceae	g__Coprococcus	s__	8.50501e-05	0.0210008	0.00308211	0.00026581
k__Bacteria	p__Firmicutes	c__Bacilli	o__Lactobacillales	f__Lactobacillaceae	g__Lactobacillus	s__	0.000213056	0.0885959	0.016536	0.0356081
k__Bacteria	p__Actinobacteria	c__Actinobacteria	o__Bifidobacteriales	f__Bifidobacteriaceae	g__Bifidobacterium	s__	0.00134815	0	0	0
k__Bacteria	p__Firmicutes	c__Clostridia	o__Clostridiales	f__Ruminococcaceae	g__Butyricicoccus	s__pullicaecorum	0.0014292	0	0	0.00444624

## Sheet: 7dpi_asv
Taxonomy							Control	Benign	Harmful	Invasive
k__Bacteria	p__Firmicutes	c__Clostridia	o__Clostridiales	f__Ruminococcaceae	g__Oscillospira	s__	0.000644235	4.85598e-05	0	0
k__Bacteria	p__Bacteroidetes	c__Bacteroidia	o__Bacteroidales	f__Bacteroidaceae	g__Bacteroides	s__fragilis	0.0334338	0.116904	0.0355937	0
k__Bacteria	p__Bacteroidetes	c__Bacteroidia	o__Bacteroidales	f__Bacteroidaceae	g__Bacteroides	s__	0	0	0	0.00951521

## Sheet: 14dpi_asv
Taxonomy							Control	Benign	Harmful	Invasive
k__Bacteria	p__Firmicutes	c__Clostridia	o__Clostridiales	f__Ruminococcaceae	g__Faecalibacterium	s__prausnitzii	0.00659071	0.0560249	0.0162077	0
k__Bacteria	p__Firmicutes	c__Clostridia	o__Clostridiales	f__Ruminococcaceae	g__Butyricicoccus	s__pullicaecorum	0.000405793	0.000117069	0.00018952	0.00678059
k__Bacteria	p__Firmicutes	c__Clostridia	o__Clostridiales	f__Ruminococcaceae	g__Ruminococcus	s__	9.60828e-05	0.00590304	0.00459018	0.0463097
k__Bacteria	p__Firmicutes	c__Clostridia	o__Clostridiales	f__Lachnospiraceae	g__Blautia	s__	0	0.000882113	4.20701e-05	0.00167163
k__Bacteria	p__Bacteroidetes	c__Bacteroidia	o__Bacteroidales	f__Bacteroidaceae	g__Bacteroides	s__fragilis	0.0750688	0.0394318	0.0302994	0
k__Bacteria	p__Bacteroidetes	c__Bacteroidia	o__Bacteroidales	f__Bacteroidaceae	g__Bacteroides	s__	0	0	0.0251395	0.0271452
k__Bacteria	p__Firmicutes	c__Clostridia	o__Clostridiales	f__Eubacteriaceae	g__Anaerofustis	s__	0	0	0	0.00377777
k__Bacteria	p__Firmicutes	c__Clostridia	o__Clostridiales	f__[Mogibacteriaceae]	g__	s__	0	0.000861561	0.0101483	0.0282157

## Sheet: 2dpi_genus
Taxonomy						Control	Benign	Harmful	Invasive
k__Bacteria	p__Firmicutes	c__Clostridia	o__Clostridiales	f__Ruminococcaceae	__	0.0113476	0.00112372	0.00466582	0.0158821
k__Bacteria	p__Firmicutes	c__Clostridia	o__Clostridiales	f__	g__	0.144998	0.0107236	0.0644871	0.158521
k__Bacteria	p__Firmicutes	c__Clostridia	o__Clostridiales	f__Lachnospiraceae	g__	0.150703	0.196005	0.0651623	0.0802861
k__Bacteria	p__Firmicutes	c__Clostridia	o__Clostridiales	f__Ruminococcaceae	g__Oscillospira	0.150322	0.0188202	0.0906792	0.0503657
k__Bacteria	p__Firmicutes	c__Clostridia	o__Clostridiales	f__Lachnospiraceae	g__Blautia	0.00339159	0.00219666	0.00083559	0.0166308
k__Bacteria	p__Firmicutes	c__Clostridia	o__Clostridiales	__	__	0.00113629	0.00148245	0.0031479	0.0735634
k__Bacteria	p__Proteobacteria	c__Betaproteobacteria	o__Burkholderiales	f__Comamonadaceae	g__Pelomonas	0	0.000349368	0	0.000189486
k__Bacteria	p__Proteobacteria	c__Alphaproteobacteria	o__Sphingomonadales	f__Sphingomonadaceae	g__Sphingomonas	0	0.000644144	3.28311e-05	0.00265464
k__Bacteria	p__Firmicutes	c__Clostridia	o__Clostridiales	f__Lachnospiraceae	g__Dorea	0.00289375	0.0120123	0.00420277	0.0372825
k__Bacteria	p__Firmicutes	c__Erysipelotrichi	o__Erysipelotrichales	f__Erysipelotrichaceae	g__	0.00120163	0.00421887	0.0087911	0.0157933
k__Bacteria	p__Firmicutes	c__Erysipelotrichi	o__Erysipelotrichales	f__Erysipelotrichaceae	g__Coprobacillus	0.0102328	0.000571138	0.00549459	0.00250269
k__Bacteria	p__Proteobacteria	c__Epsilonproteobacteria	o__Campylobacterales	f__Campylobacteraceae	g__Campylobacter	0	0.0228004	0.0129089	0.00435231
k__Bacteria	p__Bacteroidetes	c__Bacteroidia	o__Bacteroidales	f__Bacteroidaceae	g__Bacteroides	0.000210709	0.141451	0.159386	0.0114473

## Sheet: 7dpi_genus
Taxonomy						Control	Benign	Harmful	Invasive
k__Bacteria	p__Firmicutes	c__Clostridia	o__Clostridiales	f__Ruminococcaceae	__	0.0156495	0.00217357	0.00575325	0.0206874
k__Bacteria	p__Firmicutes	c__Bacilli	o__Lactobacillales	f__Enterococcaceae	g__Enterococcus	0.00193351	0	0.000586907	0.00012922
k__Bacteria	p__Actinobacteria	c__Actinobacteria	o__Bifidobacteriales	f__Bifidobacteriaceae	g__Bifidobacterium	0.0034425	0.000144681	1.44575e+10	1.88771e+10
k__Bacteria	p__Bacteroidetes	c__Bacteroidia	o__Bacteroidales	f__Bacteroidaceae	g__Bacteroides	0.0674706	0.234026	0.116588	0.0494381
k__Bacteria	p__Proteobacteria	c__Epsilonproteobacteria	o__Campylobacterales	f__Campylobacteraceae	g__Campylobacter	0	0.01398	0.00713534	0.00748559

## Sheet: 14dpi_genus
Taxonomy						Control	Benign	Harmful	Invasive
k__Bacteria	p__Firmicutes	c__Clostridia	o__Clostridiales	f__Ruminococcaceae	g__Butyricicoccus	0.00875305	0.0157352	0.0282888	0.0723254
k__Bacteria	p__Firmicutes	c__Clostridia	o__Clostridiales	f__Ruminococcaceae	__	0.00973807	0.00771484	0.0567566	0.00950302
k__Bacteria	p__Firmicutes	c__Clostridia	o__Clostridiales	f__Lachnospiraceae	g__[Ruminococcus]	0.115679	0.0287888	0.0550322	0.227941
k__Bacteria	p__Firmicutes	c__Clostridia	o__Clostridiales	f__[Mogibacteriaceae]	g__	0.00011844	0.00196115	0.0206362	0.057614
k__Bacteria	p__Firmicutes	c__Clostridia	o__Clostridiales	f__Ruminococcaceae	g__Subdoligranulum	0.000106355	0.0215663	0.0423428	0.00847145
k__Bacteria	p__Firmicutes	c__Clostridia	o__Clostridiales	f__Lachnospiraceae	g__Blautia	0.000455264	0.00440836	0.0125045	0.00424368
k__Bacteria	p__Firmicutes	c__Erysipelotrichi	o__Erysipelotrichales	f__Erysipelotrichaceae	g__Coprobacillus	0.00123385	0.00191899	0.0042381	0.000863051
k__Bacteria	p__Proteobacteria	c__Deltaproteobacteria	o__Desulfovibrionales	f__Desulfovibrionaceae	g__Bilophila	0	0	0.00623901	0
k__Bacteria	p__Proteobacteria	c__Epsilonproteobacteria	o__Campylobacterales	f__Campylobacteraceae	g__Campylobacter	0	0.00381667	0.00206408	0.00214452
k__Bacteria	p__Firmicutes	c__Clostridia	o__Clostridiales	f__Dehalobacteriaceae	g__Dehalobacterium	0	0.000941156	0.000807073	0.00030344
k__Bacteria	p__Firmicutes	c__Clostridia	o__Clostridiales	f__Clostridiaceae	g__Clostridium	7.49317e-05	0.00303471	0.00237926	0.00189942
